# Supplementary material for: Moderate, but Not Excessive, Training Attenuates Autophagy Machinery in Metabolic Tissues
Source: PubMed Central journal article supplement (PMC7697344; doi:10.3390/ijms21228416), 2020-11-10
Supplement: ijms-21-08416-s001.pdf [file ijms-21-08416-s001.pdf]

## Supplementary files

**Table S1.** M and B-mode echocardiogram parameters for the experimental groups at weeks 0, 4, and 8.

| Variables                  | CT group   |            |            | END group  |            |            | RES group  |            |            | CONC group |            |            | OT group   |            |            |
|----------------------------|------------|------------|------------|------------|------------|------------|------------|------------|------------|------------|------------|------------|------------|------------|------------|
|                            | W0         | W4         | W8         | W0         | W4         | W8         | W0         | W4         | W8         | W0         | W4         | W8         | W0         | W4         | W8         |
| IVS;d (mm)                 | 0.7±0.1    | 0.8±0.1    | 0.9±0.1    | 0.8±0.1    | 0.7±0.1    | 0.8±0.1    | 0.7±0.1    | 0.8±0.1    | 0.8±0.1    | 0.8±0.1    | 0.9±0.1    | 0.8±0.0    | 0.8±0.0    | 0.8±0.0    | 0.8±0.1    |
| IVS;s (mm)                 | 1.1±0.2    | 1.1±0.1    | 1.2±0.1    | 1.1±0.2    | 1.0±0.1    | 1.2±0.1    | 1.0±0.1    | 1.2±0.1    | 1.1±0.2    | 1.1±0.2    | 1.2±0.1    | 1.1±0.1    | 1.2±0.1    | 1.1±0.1    | 1.2±0.1    |
| LVID;d (mm)                | 3.9±0.3    | 4.1±0.2    | 3.8±0.3    | 4.0±0.3    | 4.1±0.2    | 4.2±0.2    | 3.7±0.2    | 3.9±0.1    | 4.0±0.2    | 3.9±0.2    | 3.9±0.3    | 4.1±0.2    | 4.0±0.2    | 4.2±0.2    | 4.2±0.1    |
| LVID; s (mm)               | 2.9±0.4    | 3.3±0.3    | 3.0±0.4    | 3.1±0.3    | 3.3±0.2    | 3.2±0.2    | 2.9±0.2    | 2.9±0.2    | 3.1±0.3    | 3.1±0.1    | 3.0±0.4    | 3.3±0.3    | 3.1±0.2    | 3.5±0.3    | 3.2±0.2    |
| LVPW; d (mm)               | 0.6±0.1    | 0.7±0.1    | 0.8±0.1    | 0.7±0.1    | 0.7±0.1    | 0.7±0.1    | 0.6±0.1    | 0.7±0.1    | 0.7±0.1    | 0.6±0.1    | 0.7±0.0    | 0.6±0.1    | 0.7±0.1    | 0.8±0.1    | 0.6±0.1    |
| LVPW; s (mm)               | 0.9±0.1    | 0.9±0.2    | 1.0±0.2    | 0.9±0.2    | 0.9±0.1    | 1.0±0.2    | 0.7±0.1    | 0.9±0.2    | 0.9±0.2    | 0.8±0.2    | 0.8±0.1    | 0.7±0.2    | 0.9±0.2    | 0.9±0.2    | 0.8±0.1    |
| EF (%)                     | 50.0±7.4   | 39.0±9.6   | 45.9±9.1   | 45.0±5.9   | 40.5±9.4   | 48.3±6.3   | 46.4±7.6   | 50.9±7.6   | 44.3±8.1   | 44.2±4.8   | 46.6±10.9  | 40.7±6.3   | 45.9±9.0   | 37.7±7.4   | 47.3±2.6   |
| FS (%)                     | 25.1±4.4   | 18.8±5.4   | 22.6±5.4   | 22.1±3.4   | 19.7±5.2   | 24.2±3.8   | 22.8±4.4   | 25.7±4.9   | 21.7±4.6   | 21.5±2.8   | 23.2±6.7   | 19.7±3.5   | 22.8±5.3   | 18.1±4.1   | 23.5±1.5   |
| LV mass (mg)               | 73.5±14.4  | 113.3±12.7 | 94.9±4.2   | 85.4±13.3  | 86.4±9.8   | 99.2±22.1  | 61.5±11.2  | 85.4±13.9* | 85.3±13.3* | 76.3±18.2  | 86.7±13.0  | 76.4±6.9   | 86.6±15.8  | 100.1±11.6 | 87.8±12.2  |
| LV vol; d (uL)             | 67.5±13.4  | 74.4±6.6   | 64.3±11.7  | 71.5±13.7  | 75.5±10.7  | 79.8±9.3   | 59.1±7.6   | 67.9±4.0   | 68.5±6.8   | 66.6±7.1   | 67.6±12.2  | 74.8±8.1   | 71.5±7.2   | 80.7±10.6  | 79.1±5.8   |
| LV vol; s (uL)             | 34.6±12.2  | 45.7±10.0  | 35.5±10.3  | 39.5±9.8   | 44.7±7.6   | 41.0±4.7   | 31.6±5.9   | 33.2±4.4   | 38.3±8.4   | 37.1±3.5   | 36.8±12.0  | 44.6±8.3   | 38.6±7.0   | 50.5±10.3  | 41.8±4.8   |
| HR (bpm)                   | 446.8±18.4 | 407.2±41.5 | 398.4±65.4 | 388.0±50.1 | 382.4±33.0 | 443.7±51.1 | 402.9±50.9 | 330.9±20.3 | 376.7±33.0 | 401.6±42.8 | 371.8±36.7 | 395.2±35.7 | 420.2±32.2 | 421.9±39.1 | 412.3±66.0 |
| CO (mL/min)                | 14.2±0.5   | 13.4±1.2   | 11.1±1.8   | 10.9±2.3   | 11.8±2.9   | 16.3±5.9   | 11.9±1.7   | 11.1±1.3   | 10.7±1.7   | 12.0±2.7   | 12.8±2.1   | 11.4±1.5   | 15.1±3.0   | 15.2±3.3   | 15.9±2.7   |
| B-Mode                     | W0         | W4         | W8         | W0         | W4         | W8         | W0         | W4         | W8         | W0         | W4         | W8         | W0         | W4         | W8         |
| Area; d (mm <sup>2</sup> ) | 22.5±1.8   | 24.7±1.0   | 23.0±2.2   | 22.4±2.4   | 23.8±0.7   | 24.8±2.7   | 21.1±1.1   | 23.0±1.9   | 22.9±1.8   | 21.6±2.2   | 24.1±1.2   | 24.2±1.9   | 23.6±1.9   | 26.0±1.2   | 25.2±1.9   |
| Area; s (mm <sup>2</sup> ) | 13.9±2.6   | 16.3±1.4   | 15.5±2.5   | 14.4±2.0   | 16.4±1.6   | 16.0±2.3   | 13.0±0.7   | 14.1±1.0   | 15.7±1.1*# | 13.5±1.2   | 15.1±1.5   | 17.0±1.7   | 14.0±1.9   | 17.4±1.3   | 15.6±1.7   |
| CO (mL/min)                | 14.3±0.5   | 13.9±0.7   | 11.5±2.0   | 15.8±13.1  | 11.4±2.6   | 16.1±5.9   | 12.1±1.6   | 11.6±1.2   | 10.8±1.7   | 12.3±3.0   | 13.3±2.3   | 11.6±1.7   | 14.7±2.6   | 15.1±3.9   | 15.5±3.1   |
| EF (%)                     | 55.0±6.5   | 49.5±4.8   | 48.5±9.1   | 48.6±8.1   | 46.3±8.6   | 51.1±9.4   | 56.3±0.8   | 55.8±2.3   | 47.8±5.4   | 54.9±3.8   | 54.0±6.2   | 45.1±3.3*# | 57.7±6.1   | 47.9±6.8   | 54.7±3.6   |
| FS (%)                     | 13.2±5.6   | 13.6±2.2   | 11.0±3.1   | 17.4±11.7  | 11.2±4.8   | 14.8±6.2   | 13.7±1.9   | 15.8±3.4   | 10.1±1.8*  | 15.3±1.7   | 14.2±4.5   | 11.2±1.5   | 16.2±4.9   | 13.6±4.9   | 15.7±3.3   |
| SV (uL)                    | 31.9±1.0   | 33.0±3.0   | 28.3±5.5   | 28.5±7.5   | 30.6±5.5   | 35.9±9.5   | 29.5±2.6   | 33.7±3.8   | 28.7±6.3   | 29.9±4.9   | 34.4±3.7   | 28.8±2.8   | 35.9±5.9   | 35.8±6.2   | 38.7±4.6   |
| V;d (uL)                   | 58.8±7.6   | 66.8±5.4   | 59.1±10.0  | 58.4±8.4   | 66.3±2.4   | 70.1±11.4  | 52.4±4.4   | 60.4±7.2   | 59.5±8.1   | 54.4±7.7   | 63.8±4.7   | 64.2±7.8   | 62.3±8.9   | 74.6±4.5   | 70.8±8.1   |
| V;s (uL)                   | 26.9±7.3   | 33.9±5.2   | 30.8±8.4   | 29.8±5.6   | 35.7±6.2   | 34.2±7.4   | 22.9±1.9   | 26.7±3.9   | 30.8±3.4*# | 24.5±3.8   | 29.5±5.1   | 35.4±5.8   | 26.4±5.4   | 38.7±4.7   | 32.1±5.1   |

W0–Week 0; W4–Week 4; W8–Week 8; IVS; d–Interventricular septum thickness at end-diastole; IVS; s–Interventricular septum thickness at end-systole; LVID; d–Left ventricular internal dimension at end-diastole; LVID; s–Left ventricular internal dimension at end-systole; LVPW; d–Left ventricular posterior wall thickness at end-diastole; LVPW; s–Left ventricular posterior wall thickness at end-systole; EF–Ejection fraction; FS–Fractional shortening; LV–Left ventricle; LV vol; d–Left ventricle volume at end-diastole; LV vol; s–Left ventricle volume at end-systole; HR–Heart rate; CO–Cardiac output; SV–Stroke volume; V; d–Volume at end-diastole; V; s–Volume at end-systole. Data correspond to mean ± SEM of 5 mice/group. \* $p < 0.05$  vs. week 0; # $p < 0.05$  vs. week 4. CT (Sedentary; control group); END (Endurance; submitted to the chronic endurance exercise protocol); RES (Resistance; submitted to the chronic resistance exercise protocol); CONC (Concurrent; submitted to the chronic concurrent exercise protocol); OT (Overtraining; submitted to the chronic exhaustive exercise protocol).

**Table S2.** Primers used to RT-qPCR.

| <b>Gene</b>     | <b>Forward (5'-3')</b> | <b>Reverse (5'-3')</b>     |
|-----------------|------------------------|----------------------------|
| <i>Prkaa1</i>   | CCAGGTCATCAGTACACCATCT | TTTCCTTTTCGTCCAACCTTCC     |
| <i>Mtor</i>     | CCACGTGGTTAGCCAGACT    | TAGCGGATATCAGGGTCAGGA      |
| <i>Ulk1</i>     | AACATCCGAGTCAAGATTGCTG | ATAATGACCTCAGGAGCCATGT     |
| <i>Atg5</i>     | GCTTTTGCCAAGAGTCAGCTAT | AACCAATTGGATAATGCCATTTTCAG |
| <i>Becn1</i>    | AGGAACTCACAGCTCCATTACT | CTCTCCTGAGTTAGCCTCTTCC     |
| <i>Bnip3</i>    | CAGCATGAGAAACACAAGCG   | TCCAATGTACCCCAAGCC         |
| <i>Map1lc3b</i> | AGATAATCAGACGGCGCTTG   | TCGTACACTTCGGAGATGGG       |
| <i>Sqstm1</i>   | ACAGCCAGAGGAACAGATGG   | GTAGAGACTGGAGTTCACCTGTA    |
| <i>Gapdh</i>    | AAGAGGGATGCTGCCCTTAC   | CGGGACGAGGAAACACTCTC       |

*Prkaa1*: Protein kinase, AMP-activated, alpha 1 catalytic subunit; *Mtor*: Mechanistic target of rapamycin kinase; *Ulk1*: Unc-51 like kinase 1; *Atg5*: Autophagy-related 5; *Becn1*: Beclin1; *Bnip3*: BCL2 interacting protein 3; *Map1lc3b*: Microtubule-associated protein 1 light chain 3 beta; *Sqstm1*: Sequestosome 1/p62; *Gapdh*: Glyceraldehyde-3-phosphate dehydrogenase.
